# Supplementary material
Source: MDPI journal article supplement (https://www.mdpi.com/2076-3387/7/1/5)
Supplement: s1 [file s1]

**Table S1.** Results: Servant leadership characteristics.

| Result Theme   | Keywords Cited                                                                                                                | Article Code                                                                                                                                                                                    | Total Article Codes                                                                                                                                                                                                                                                                                      | Count | Evidence |
|----------------|-------------------------------------------------------------------------------------------------------------------------------|-------------------------------------------------------------------------------------------------------------------------------------------------------------------------------------------------|----------------------------------------------------------------------------------------------------------------------------------------------------------------------------------------------------------------------------------------------------------------------------------------------------------|-------|----------|
| Authenticity   | Self-awareness, self-identity                                                                                                 | LIT02, QNT32                                                                                                                                                                                    | LIT02, QNT05, QAL01, QNT14, QNT20, QNT32, LIT05, LIT12, MIXED03, LIT22, LIT23, QNT50, QNT53, QNT40, LIT13, QNT42, QNT47                                                                                                                                                                                  | 17    | Strong   |
|                | Authentic self, authenticity, authentic, leading authentically                                                                | LIT02, QNT05, QAL01, QNT14, QNT20, QNT32, LIT05, LIT12, MIXED03, LIT22, LIT23, QNT50, QNT53, QNT40, LIT13, QNT42, QNT47                                                                         |                                                                                                                                                                                                                                                                                                          |       |          |
| Humility       | Humility                                                                                                                      | LIT02, QAL01, QNT04, MIXED01, QNT07, QNT14, LIT05, LIT07, LIT08, QNT18, QNT20, QNT30, QNT32, QNT33, QNT35, LIT12, MIXED03, LIT23, LIT22, LIT23, QNT50, QNT53, QNT26, LIT13, QNT15, QNT48, LIT24 | LIT02, QAL01, QNT04, MIXED01, QNT07, QNT14, LIT05, LIT07, LIT08, QNT18, QNT20, QNT30, QNT32, QNT33, QNT35, LIT12, MIXED03, LIT23, LIT22, QNT50, QNT53, QNT26, LIT13, QNT15, QNT48, LIT24, LIT05                                                                                                          | 27    | Strong   |
|                | Voluntary subordination                                                                                                       | LIT05                                                                                                                                                                                           |                                                                                                                                                                                                                                                                                                          |       |          |
| Compassion     | Emotional healing                                                                                                             | QNT02, LIT02, LIT03, LIT09, QNT18, QAL02, LIT11, QNT29, QNT30, QNT32, MIXED02, LIT12, LIT17, QNT52, QNT44, QNT48, QNT49, QNT56                                                                  | QNT02, LIT02, LIT03, LIT07, LIT09, LIT11, LIT12, LIT13, LIT16, LIT17, LIT19, LIT21, LIT22, LIT23, LIT24, MIXED01, MIXED02, QAL01, QAL02, QNT04, QNT05, QNT06, QNT07, QNT14, QNT18, QNT20, QNT21, QNT24, QNT29, QNT30, QNT31, QNT32, QNT33, QNT35, QNT36, QNT40, QNT43, QNT44, QNT48, QNT49, QNT52, QNT56 | 42    | Strong   |
|                | Compassion                                                                                                                    | QNT02, QAL01, QNT35, QNT40                                                                                                                                                                      |                                                                                                                                                                                                                                                                                                          |       |          |
|                | Forgiveness                                                                                                                   | QNT05                                                                                                                                                                                           |                                                                                                                                                                                                                                                                                                          |       |          |
|                | Empathy, empathize, empathetic listeners                                                                                      | LIT02, LIT03, QNT04, MIXED01, QNT06; QNT14, LIT07, QAL02, LIT11, QNT30, QNT32, QNT35, LIT12, LIT17, LIT21, QNT52, QNT44, QNT48                                                                  |                                                                                                                                                                                                                                                                                                          |       |          |
|                | Agape love, unconditional love                                                                                                | LIT02, MIXED01, QNT07, LIT07, QNT18, QNT32, QNT33, LIT16, LIT21, LIT22, LIT23                                                                                                                   |                                                                                                                                                                                                                                                                                                          |       |          |
|                | Care, concern, kindness                                                                                                       | QNT21, LIT07, QNT20, QAL02, QNT30, QNT33, QNT43, LIT19, LIT22, QNT24, QNT31, LIT13, LIT24                                                                                                       |                                                                                                                                                                                                                                                                                                          |       |          |
|                | Others orientated, benefit of others, service orientated, put others first, value people, appreciating others, good to others | MIXED01, QNT18, QAL02, QNT32, MIXED02, LIT12, LIT16, LIT22, QNT36, QNT44                                                                                                                        |                                                                                                                                                                                                                                                                                                          |       |          |
|                | Interpersonal acceptance                                                                                                      | LIT12                                                                                                                                                                                           |                                                                                                                                                                                                                                                                                                          |       |          |
| Accountability | Responsibility, delegating responsibilities, responsible for results                                                          | QAL01, LIT13, QNT42, QNT15                                                                                                                                                                      | QAL01, LIT13, QNT42, QNT15, QNT14, LIT05, QNT50                                                                                                                                                                                                                                                          | 7     | Strong   |
|                | Accountability, accountable practices                                                                                         | QNT14, LIT05, QNT50                                                                                                                                                                             |                                                                                                                                                                                                                                                                                                          |       |          |
| Courage        | Courage (take risks), moral courage                                                                                           | QNT05, QNT14, QNT50, QNT24, QNT42                                                                                                                                                               | QNT05, QNT14, QNT50, QNT24, QNT42, QNT26                                                                                                                                                                                                                                                                 | 6     | Strong   |
|                | High ethical conduct                                                                                                          | QNT26                                                                                                                                                                                           |                                                                                                                                                                                                                                                                                                          |       |          |
| Altruism       | Altruistic calling, altruism, altruism mind-set, altruistic                                                                   | QNT05, QAL07, QNT04, MIXED01, QNT07, LIT08, QNT18, QNT32, MIXED02, LIT12, LIT17; LIT23, QNT53, QNT36, QNT40, QNT48                                                                              | QNT05, QAL07, QNT04, MIXED01, QNT07, LIT08, QNT18, QNT32, MIXED02, LIT12, LIT17; LIT23, QNT53, QNT36, QNT40, QNT48, QAL01                                                                                                                                                                                | 17    | Strong   |
|                | Serving others first                                                                                                          | QAL01                                                                                                                                                                                           |                                                                                                                                                                                                                                                                                                          |       |          |
| Integrity      | Behave ethically, ethical work climate, ethical models                                                                        | QNT02, LIT02, QNT22, QNT29, QNT30, QNT24, QNT26, QNT39; QNT40, QNT44, QNT49, QNT56                                                                                                              | QNT02, LIT02, QNT22, QNT29, QNT30, QNT24, QNT26, QNT39; QNT40, QNT44,                                                                                                                                                                                                                                    | 30    | Strong   |

|           |                                                                   |                                                                                                                           |                                                                                                                                                |    |        |
|-----------|-------------------------------------------------------------------|---------------------------------------------------------------------------------------------------------------------------|------------------------------------------------------------------------------------------------------------------------------------------------|----|--------|
|           | Responsible morality, moral integrity, moral, moral compass       | LIT02, LIT05, QNT32, QNT35, QNT41; MIXED03, QNT24, QNT40, QNT47                                                           | QNT49, QNT56, LIT05, QNT32, QNT35, QNT41; MIXED03, QNT47, QNT05, LIT07, LIT09, QAL02, MIXED02, LIT12, QNT41, QNT43, QNT52, QNT48, LIT24, QNT33 |    |        |
|           | Integrity, personal integrity                                     | QNT05, LIT05, LIT07, LIT09, QAL02, MIXED02, LIT12, QNT41, QNT43, MIXED03, QNT52, QNT24; QNT26, QNT44, QNT48, LIT24        |                                                                                                                                                |    |        |
|           | Honesty                                                           | QNT33, LIT12, QNT24, QNT26                                                                                                |                                                                                                                                                |    |        |
| Listening | Listening, active listening, listen respectively, listen first    | QAL07, QNT04, MIXED01, QNT14, LIT05, LIT07, LIT09, QNT32, MIXED02, QNT35, LIT12, LIT19, LIT22, QNT44, LIT03, LIT11, QNT48 | QAL07, QNT04, MIXED01, QNT14, LIT05, LIT07, LIT09, QNT32, MIXED02, QNT35, LIT12, LIT19, LIT22, QNT44, LIT03, LIT11, QNT48, LIT03, LIT13, QNT36 | 20 | Strong |
|           | Deep commitment                                                   | LIT03, LIT19                                                                                                              |                                                                                                                                                |    |        |
|           | Need for silence, reflection, meditation                          | LIT03, LIT11, LIT19                                                                                                       |                                                                                                                                                |    |        |
|           | Ask questions, knowledge creation                                 | QAL07, LIT13                                                                                                              |                                                                                                                                                |    |        |
|           | Feels human condition, hearing inner voice, listen what is unsaid | QNT36, LIT19                                                                                                              |                                                                                                                                                |    |        |

**Table S2.** Results: Servant leadership competencies.

| Result Theme | Keywords Cited                                                                                                                                                                                                                                                                                                                                                                                                                                                          | Article Code                                                                                                                                                                                                                                                                               | Total Article Codes                                                                                                                                                                                                                                                                                                                                                                      | Count | Evidence |
|--------------|-------------------------------------------------------------------------------------------------------------------------------------------------------------------------------------------------------------------------------------------------------------------------------------------------------------------------------------------------------------------------------------------------------------------------------------------------------------------------|--------------------------------------------------------------------------------------------------------------------------------------------------------------------------------------------------------------------------------------------------------------------------------------------|------------------------------------------------------------------------------------------------------------------------------------------------------------------------------------------------------------------------------------------------------------------------------------------------------------------------------------------------------------------------------------------|-------|----------|
| Empowerment  | Empowering employees, empowerment, psychological empowerment, empower,                                                                                                                                                                                                                                                                                                                                                                                                  | QNT02, LIT02, QNT05, QNT21, QNT07, QNT13, QNT14, LIT07, LIT08, LIT09, QNT18, QNT29, QNT30, MIXED02, QNT35, QNT37, LIT12, QNT43, LIT16, LIT22, LIT23, QNT50, QNT53, QNT25, QNT26, LIT13, QNT44, QNT47, QNT15, QNT48, QNT56                                                                  | QNT02, LIT02, QNT05, QAL01, QANT09, QNT11, LIT03, QNT21, QAL07, QNT23, LIT01, QNT04, MIXED01, QNT06, QNT07, QNT13, QNT14, LIT07, LIT08, LIT09, QNT18, QNT22, QNT29, QNT30, QNT32, MIXED02, QNT35, QNT37, LIT12, QNT43, LIT16, LIT17, MIXED03, LIT19, LIT22, LIT23, QNT50, QNT53, QNT24, QNT25, QNT26, QNT31, QNT36, LIT13, QNT42, QNT44, QNT47, QNT15, QNT48, QNT49, LIT42, QNT55, QNT56 | 54    | Strong   |
|              | Commitment to growth of people, developing people, employee growth, personal growth, learning, growing followers, enhance skills, provide opportunities, personal needs and growth, enable potential, make servant leaders, moral development, develop others, prioritize growth, healthy growth, follower development, helping subordinates grow and succeed, personal, professional, and spiritual growth, training, enable employees, strengthen capability, prosper | LIT02, QNT05, QAL01, QNT09, QNT11, LIT03, QNT21, QAL07, LIT01, QNT04, MIXED01, QNT06, LIT07, QNT18, QNT22, LIT11, QNT32, MIXED02, QNT35, QNT37, LIT12, LIT17, LIT19, LIT22, LIT23, QNT50, QNT53, QNT24, QNT25, QNT26, QNT31, QNT36, LIT13, LIT13, QNT44, QNT47, QNT48, QNT49, LIT24, QNT55 |                                                                                                                                                                                                                                                                                                                                                                                          |       |          |
|              | Transforming influence                                                                                                                                                                                                                                                                                                                                                                                                                                                  | LIT02, QNT18, MIXED03, QNT53                                                                                                                                                                                                                                                               |                                                                                                                                                                                                                                                                                                                                                                                          |       |          |
|              | Transfer responsibility, when and how to complete tasks, clear expectations                                                                                                                                                                                                                                                                                                                                                                                             | QNT05, QNT29                                                                                                                                                                                                                                                                               |                                                                                                                                                                                                                                                                                                                                                                                          |       |          |

|                        |                                                                                                                                                                                                                                                                                                                                                             |                                                                                                                                                                                                                                    |                                                                                                                                                                                                                                                                                                                                                                                                |    |        |
|------------------------|-------------------------------------------------------------------------------------------------------------------------------------------------------------------------------------------------------------------------------------------------------------------------------------------------------------------------------------------------------------|------------------------------------------------------------------------------------------------------------------------------------------------------------------------------------------------------------------------------------|------------------------------------------------------------------------------------------------------------------------------------------------------------------------------------------------------------------------------------------------------------------------------------------------------------------------------------------------------------------------------------------------|----|--------|
|                        | Encouraging talents, help use personality and passion                                                                                                                                                                                                                                                                                                       | QNT06, QNT14                                                                                                                                                                                                                       |                                                                                                                                                                                                                                                                                                                                                                                                |    |        |
|                        | Entrust authority, give personal power                                                                                                                                                                                                                                                                                                                      | QNT23, QNT50, QNT42                                                                                                                                                                                                                |                                                                                                                                                                                                                                                                                                                                                                                                |    |        |
|                        | Autonomous decision-making, identify and solve problems                                                                                                                                                                                                                                                                                                     | QNT14, QNT29, LIT19, LIT22, LIT13, QNT15                                                                                                                                                                                           |                                                                                                                                                                                                                                                                                                                                                                                                |    |        |
|                        | Sharing information                                                                                                                                                                                                                                                                                                                                         | QNT14, MIXED02, LIT22, QNT50, QNT15                                                                                                                                                                                                |                                                                                                                                                                                                                                                                                                                                                                                                |    |        |
|                        | Coaching, mentoring, support                                                                                                                                                                                                                                                                                                                                | QNT14, LIT22, QNT50, LIT13, QNT15                                                                                                                                                                                                  |                                                                                                                                                                                                                                                                                                                                                                                                |    |        |
|                        | Good work environment, fostering environment                                                                                                                                                                                                                                                                                                                | MIXED02, QNT35                                                                                                                                                                                                                     |                                                                                                                                                                                                                                                                                                                                                                                                |    |        |
|                        | Proactive behaviour, self-confident attitude, self-esteem, self-worth, strengthen wellbeing, feel safe                                                                                                                                                                                                                                                      | QNT35, QNT50, QNT31, LIT13, QNT42, QNT55                                                                                                                                                                                           |                                                                                                                                                                                                                                                                                                                                                                                                |    |        |
|                        | Mature vocationally, emotionally, intellectually, and ethically.                                                                                                                                                                                                                                                                                            | QNT47                                                                                                                                                                                                                              |                                                                                                                                                                                                                                                                                                                                                                                                |    |        |
| Stewardship            | Greater good of society, good of the whole, community development, social responsibility, both organisation and members,                                                                                                                                                                                                                                    | LIT02, QNT05, QNT04, LIT09, LIT11, MIXED02, LIT22, LIT23, QNT53, QNT24, QNT34, QNT36, QNT38, LIT13, QNT15, QNT48, QNT49                                                                                                            | LIT02, QNT05, LIT03, QNT23, LIT01, QNT04, QNT14, LIT07, LIT08, LIT09, QNT18, QNT19, QAL02, LIT11, QNT32, MIXED02, QNT35, LIT12, LIT17, LIT18, LIT19, LIT22, LIT23, QNT50, QNT53, QNT24, QNT34, QNT36, QNT38, QNT40, LIT13, QNT42, QNT44, QNT15, QNT48, QNT49, LIT15                                                                                                                            | 37 | Strong |
|                        | Stewardship, organisational stewardship, steward of environment, not owner, caretaker, entrusted,                                                                                                                                                                                                                                                           | LIT02, QNT05, LIT01, QNT04, QNT04, LIT07, LIT08, LIT09, QNT08, QNT19, QAL02, LIT11, QNT32, MIXED02, LIT12, LIT17, LIT18, LIT19, LIT22, LIT23, QNT34, QNT36, QNT38, QNT40, LIT13, QNT42, QNT44, QNT15, QNT48,                       |                                                                                                                                                                                                                                                                                                                                                                                                |    |        |
|                        | Ownership, accountable without control, serving needs of others, shared responsibility, common interest,                                                                                                                                                                                                                                                    | LIT03, QNT23, LIT12, LIT22, QNT42, QNT15,                                                                                                                                                                                          |                                                                                                                                                                                                                                                                                                                                                                                                |    |        |
|                        | Leave positive legacy                                                                                                                                                                                                                                                                                                                                       | QNT04, MIXED02                                                                                                                                                                                                                     |                                                                                                                                                                                                                                                                                                                                                                                                |    |        |
| Building Relationships | High trust, organizational trust, mutual trust                                                                                                                                                                                                                                                                                                              | QNT02, QNT11, QNT21, QAL07, QNT23, QNT06, QNT07, LIT07, LIT09, QNT18, QNT19, QNT20, QAL02, QNT30, QNT32, MIXED02, LIT12, LIT16, MIXED03, LIT22, QNT50, QNT53, QNT24, QNT26, QNT31, QNT34, QNT40, LIT13, QNT44, QNT48               | QNT02, LIT02, QNT05, QAL01, QNT09, QNT11, QNT21, QAL07, QNT23, LIT01, QNT06, LIT05, LIT07, LIT08, QNT18, QNT20, QNT22, QAL02, QNT29, QNT32, QNT35, QNT37, LIT20, LIT22, QNT53, QNT24, QNT26, QNT31, QNT38, QNT40, LIT13, QNT44, QNT47, QNT48, LIT15, LIT02, QNT04, MIXED01, QNT07, QNT14, LIT09, QNT19, QNT30, QNT32, MIXED02, QNT33, LIT12, LIT16, MIXED03, LIT19, QNT50, QNT53, QNT31, QNT34 | 54 | Strong |
|                        | Long-term relationships, conventional relationship, quality relationship, interpersonal bonds, range of organisations and people, internal and community relationships, long term commitment, relational power, relationship with customers, followers and community, social exchange relationships, high quality dyadic relationship, various stakeholders | QNT02, LIT02, QNT05, LIT02, QNT09, QNT11, QNT21, LIT01, MIXED01, QNT06, LIT05, LIT07, LIT08, QNT18, QNT19, QNT20, QNT22, QAL02, QNT29, QNT32, QNT35, QNT37, MIXED03, LIT20, LIT22, QNT50, QNT53, QNT26, QNT31, QNT38, LIT13, QNT47 |                                                                                                                                                                                                                                                                                                                                                                                                |    |        |

|                   |                                                                                                                                                                                                                                                                                                                       |                                                                                                                                                     |                                                                                                                                                                                                                    |    |        |
|-------------------|-----------------------------------------------------------------------------------------------------------------------------------------------------------------------------------------------------------------------------------------------------------------------------------------------------------------------|-----------------------------------------------------------------------------------------------------------------------------------------------------|--------------------------------------------------------------------------------------------------------------------------------------------------------------------------------------------------------------------|----|--------|
|                   | Interpersonal acceptance, nourishing followers, concern for welfare, forgiveness, patience                                                                                                                                                                                                                            | LIT02, QAL07, MIXED02, LIT12, LIT23, QNT50, QNT44, MIXED03, QNT40, LIT13, QNT50, QNT33                                                              |                                                                                                                                                                                                                    |    |        |
|                   | Building confidence, positive feelings, self-concept-based motivation, encouragement, inspire, encourage                                                                                                                                                                                                              | QAL01, QNT20, QAL02, LIT22, QNT31, QNT31                                                                                                            |                                                                                                                                                                                                                    |    |        |
|                   | Understand, understand needs and aspirations, know, understand abilities, desires, goals and potential, understand mental models                                                                                                                                                                                      | QAL01, QAL07, MIXED01, QNT29, LIT22, QNT31, QNT40, LIT13                                                                                            |                                                                                                                                                                                                                    |    |        |
|                   | Quality time, availability                                                                                                                                                                                                                                                                                            | QNT09, QNT22, MIXED03                                                                                                                               |                                                                                                                                                                                                                    |    |        |
|                   | Share information, share frustrations, knowledge sharing and creation                                                                                                                                                                                                                                                 | QAL07, MIXED01, QNT31, LIT13                                                                                                                        |                                                                                                                                                                                                                    |    |        |
|                   | Effective communication, listening, interaction, one-on-one communication, provide feedback, engage with, open-ended communication, reflection                                                                                                                                                                        | LIT05, LIT07, LIT08, LIT09, QNT20, QNT20, QNT32, MIXED02, QNT35, LIT12, MIXED03, LIT19, LIT22, QNT31, QNT44                                         |                                                                                                                                                                                                                    |    |        |
|                   | Provide resources, support, feel safe, loyalty                                                                                                                                                                                                                                                                        | QNT20, QNT29, QNT37, LIT22, QNT50, QNT31,                                                                                                           |                                                                                                                                                                                                                    |    |        |
|                   | Influence, persuasion                                                                                                                                                                                                                                                                                                 | MIXED02, LIT12, LIT19, LIT22, LIT13,                                                                                                                |                                                                                                                                                                                                                    |    |        |
|                   | Respect, appreciation, acceptance, equality, equal partners, intrinsic individual value, acknowledgement, recognition, realising abilities                                                                                                                                                                            | QNT33, LIT16, MIXED03, LIT22, QNT47                                                                                                                 |                                                                                                                                                                                                                    |    |        |
|                   | Shared values                                                                                                                                                                                                                                                                                                         | MIXED03, QNT40                                                                                                                                      |                                                                                                                                                                                                                    |    |        |
|                   | Collaboration, build consensus                                                                                                                                                                                                                                                                                        | MIXED03, LIT19, LIT22                                                                                                                               |                                                                                                                                                                                                                    |    |        |
| Compelling Vision | Providing direction, conceptual skills, conceptualisation, intuitive mind, vision, preoccupation with future, visioning, goal setting, plan for future opportunities, creative, visionary                                                                                                                             | LIT02, QNT21, LIT07, QNT22, QAL02, LIT11, QNT32, MIXED02, QNT35, LIT12, QNT43, LIT16, LIT19, LIT22, LIT23, QNT53, QNT26, QNT36, QNT44, QNT48, LIT24 | LIT02, QNT09, LIT03, QNT21, LIT07, QNT22, QAL02, LIT11, MIXED02, QNT35, QNT37, LIT12, QNT43, LIT16, LIT17, LIT19, LIT21, LIT22, LIT23, QNT53, QNT26, QNT36, QNT38, LIT13, QNT44, QNT15, QNT48, QNT49, LIT24, LIT15 | 31 | Strong |
|                   | Foresight, understand past, present and future, balancing daily work with future vision, likely outcome, system thinker, foreseeing likely events, wisdom, knowledge of industry and organisation, conscious about present and future events, gathering information from environment, predict future, sound judgement | LIT02, QNT09, LIT03, LIT07, QNT22, QAL22, LIT11, MIXED02, QNT35, LIT12, LIT17, LIT19, LIT22, QNT38, QNT44, QNT48, QNT49, LIT24                      |                                                                                                                                                                                                                    |    |        |
|                   | Create value for community, creating external value                                                                                                                                                                                                                                                                   | LIT02, QNT37, LIT12, QNT53, QNT26, QNT44, QNT49                                                                                                     |                                                                                                                                                                                                                    |    |        |

**Table S3.** Results: Servant leadership measures.

| Characteristic / Competence   | Laub (1999)          | Page and Wong (2000)                                         | Dennis and Bocarnea (2005) | Ehrhart (2004)                                                        | Barbuto and Wheeler (2006)                                 | Hale and Fields (2007) | Wong and Davey (2007)            | Liden, Wayne, Zhao, and Henderson (2008)                      | Sendjaya, Sarros and Santora (2008)                  | Van Dierendonck and Nuijten (2011) |
|-------------------------------|----------------------|--------------------------------------------------------------|----------------------------|-----------------------------------------------------------------------|------------------------------------------------------------|------------------------|----------------------------------|---------------------------------------------------------------|------------------------------------------------------|------------------------------------|
| <b>Authentic</b>              | Display authenticity |                                                              |                            |                                                                       |                                                            |                        | Modelling authenticity           |                                                               | Authentic self                                       | Authenticity                       |
| <b>Humility</b>               | Shares leadership    | Humility                                                     | Humility                   |                                                                       |                                                            | Humility               | Humility and selflessness        |                                                               | Authentic self                                       | Humility                           |
| <b>Compassion</b>             | Valuing people       | Caring for others                                            | Agape love                 |                                                                       | Emotional healing                                          |                        |                                  | Emotional healing                                             | Conventional relationship                            | Forgiveness                        |
| <b>Accountability</b>         |                      |                                                              |                            |                                                                       |                                                            |                        |                                  |                                                               | Authentic self                                       | Accountability                     |
| <b>Courage</b>                |                      |                                                              |                            |                                                                       |                                                            |                        |                                  |                                                               |                                                      | Courage                            |
| <b>Altruism</b>               |                      | Servanthood                                                  |                            | Putting subordinates first                                            | Altruistic calling                                         | Service                | Humility and selflessness        | Putting subordinates first                                    | Voluntary subordination                              | Standing back                      |
| <b>Integrity</b>              |                      | Integrity                                                    |                            | Behaving ethically                                                    |                                                            |                        | Modelling integrity              | Behaving ethically                                            | Authentic self                                       |                                    |
| <b>Listening</b>              |                      |                                                              |                            |                                                                       |                                                            |                        |                                  |                                                               |                                                      |                                    |
| <b>Empowerment</b>            | Developing people    | Empowering others / Developing others                        | Empowerment                | Empowering subordinates / Help subordinates grow and succeed          |                                                            |                        | Serving and developing others    | Empowerment / Help subordinates grow and succeed              | Transforming influence                               | Empowerment                        |
| <b>Stewardship</b>            | Builds community     |                                                              |                            |                                                                       | Organizational stewardship                                 |                        |                                  |                                                               | Responsible Morality                                 | Stewardship                        |
| <b>Building Relationships</b> |                      | Leading / Modelling / Team-building / Shared decision-making | Trust                      | Forming relationships with subordinates                               |                                                            |                        | Inspiring and influencing others |                                                               | Conventional relationships / Transforming influence  |                                    |
| <b>Compelling Vision</b>      | Providing leadership | Visioning / Goal setting                                     | Vision                     | Conceptual skills / Create value for community                        | Persuasive mapping / Wisdom                                | Vision                 |                                  | Conceptual skills / Creating value for community              | Transcendental spirituality / Transforming influence |                                    |
| <b>Used</b>                   | QNT35                | QNT29, QNT52                                                 | QNT18                      | QNT20, QNT22, QNT29, QNT37, QNT51, QNT24, QNT25, QNT26, QNT31, QNT34, | MIXED01, QNT12, QNT29, MIXED02, QNT28, QNT31, QNT38, QNT55 |                        |                                  | QNT08, QNT13, QNT30, QNT41, QNT45, QNT53, QNT31, QNT39, QNT49 | QNT06, QNT40, QNT47                                  | QNT14, QNT16, QNT19, QNT42         |

|                 |                                                     |                                                            |                                                |                                         |                                                                                  |              |                 |                                                                           |                                                                   |                                                          |
|-----------------|-----------------------------------------------------|------------------------------------------------------------|------------------------------------------------|-----------------------------------------|----------------------------------------------------------------------------------|--------------|-----------------|---------------------------------------------------------------------------|-------------------------------------------------------------------|----------------------------------------------------------|
|                 |                                                     |                                                            |                                                | QNT36, QNT54,<br>QNT56                  |                                                                                  |              |                 |                                                                           |                                                                   |                                                          |
| <b>Cited</b>    | LIT02, QNT32,<br>QNT37,<br>MIXED03,<br>LIT22, QNT50 | QNT07, LIT12,<br>MIXED03, LIT22,<br>QNT50, QNT53,<br>LIT13 | QNT32, LIT12,<br>LIT22, QNT50,<br>QNT53, QNT48 | QNT37, LIT12,<br>LIT22, QNT50,<br>QNT31 | QNT04,<br>MIXED01,<br>QNT37, LIT12,<br>MIXED03,<br>LIT22, QNT53,<br>QNT31, QNT48 | QNT53        | LIT22,<br>QNT50 | QNT37, LIT12,<br>LIT22, QNT53,<br>QNT31, LIT13,<br>QNT48, QNT49,<br>QNT55 | QNT06, QNT37,<br>LIT12, MIXED03,<br>LIT22, QNT50,<br>LIT13, QNT47 | LIT02, QNT05,<br>LIT12, LIT22,<br>QNT53, LIT13,<br>QNT15 |
| <b>Actual</b>   |                                                     |                                                            |                                                |                                         | QNT04                                                                            |              |                 | QNT29                                                                     | MIXED03                                                           | QNT50                                                    |
| <b>Evidence</b> | Strong                                              | Strong                                                     | Strong                                         | Strong                                  | Strong                                                                           | Insufficient | Strong          | Strong                                                                    | Strong                                                            | Strong                                                   |

**Table S4.** Results: Servant leadership outcomes.

| Impact Level | Result Theme       | Research Result                                                                                             | Quality                   | Article Code                  | Total Article Codes                         | Count | Evidence |
|--------------|--------------------|-------------------------------------------------------------------------------------------------------------|---------------------------|-------------------------------|---------------------------------------------|-------|----------|
| Individual   | Burnout            | Servant leadership reduce burnout                                                                           | High                      | QNT01                         | QNT01, QNT05, QNT49                         | 3     | Strong   |
|              |                    | Servant leadership negative related to cynicism                                                             | High                      | QNT05                         |                                             |       |          |
|              |                    | Servant leadership negative related to emotional exhaustion                                                 | High                      | QNT49                         |                                             |       |          |
|              |                    | Person-job fit mediates servant leadership and burnout                                                      | High                      | QNT01                         |                                             |       |          |
|              | Work Engagement    | Servant leadership enhance work engagement                                                                  | High, High,<br>High, High | QNT13, QNT14,<br>QNT15, QAL01 | QNT13, QNT14, QNT22,<br>QAL01               | 4     | Strong   |
|              |                    | Goal congruence and social interaction moderated servant leadership and work engagement                     | High                      | QNT13                         |                                             |       |          |
|              |                    | Organisational identification and psychological empowerment mediates servant leadership and work engagement | High                      | QNT14                         |                                             |       |          |
|              |                    | Servant leadership negative related to disengagement                                                        | High                      | QNT22                         |                                             |       |          |
|              | Turnover Intention | Servant leadership reduce turnover intention                                                                | High, High                | QNT22, QNT27                  | QNT01, QNT22, QNT26,<br>QNT27, QNT30, QAL05 | 6     | Strong   |
|              |                    | Burnout mediates servant leadership and turnover intention                                                  | High                      | QNT01                         |                                             |       |          |
|              |                    | Person-job fit mediates servant leadership and turnover intention                                           | High                      | QNT01                         |                                             |       |          |
|              |                    | Person-job fit and person-organisational fit mediate servant leadership and turnover intention              | High                      | QNT26                         |                                             |       |          |
|              |                    | Employer brand perception and trust in leader mediate servant leadership and turnover intention             | High                      | QNT27                         |                                             |       |          |
|              |                    | Serving culture mediates servant leadership and turnover intention                                          | High                      | QNT30                         |                                             |       |          |
|              |                    | Servant leadership enhances employee retention                                                              | Low                       | QAL05                         |                                             |       |          |

|  |                                            |                                                                                                                                                                  |                    |                     |                                                 |   |              |
|--|--------------------------------------------|------------------------------------------------------------------------------------------------------------------------------------------------------------------|--------------------|---------------------|-------------------------------------------------|---|--------------|
|  | Dyadic Communication Style Agreement       | Servant Leadership related to dyadic communication style agreement                                                                                               | High               | QNT02               | QNT02                                           | 1 | Insufficient |
|  | Emotional Intelligence (EQ)                | EQ not related to servant leadership behaviour                                                                                                                   | High               | QNT03               | QNT03                                           | 1 | Insufficient |
|  | Organizational Citizenship Behaviour (OCB) | Servant leadership positive related to OCB                                                                                                                       | High, High         | QNT05, QNT38        | QNT05, QNT20, QNT37, QNT38, QNT39, QNT51, QNT54 | 7 | Strong       |
|  |                                            | Servant leadership positive related to service-orientated OCB (positive psychological capital mediates relationship)                                             | High               | QNT20               |                                                 |   |              |
|  |                                            | Servant leadership positive related to customer-orientated OCB (LMX mediates relationship)                                                                       | High               | QNT54               |                                                 |   |              |
|  |                                            | Servant leadership positive related to OCB (LMX mediates relationship)                                                                                           | High               | QNT37               |                                                 |   |              |
|  |                                            | Servant leadership enhances OCB (individual initiative and loyal boosterism) (psychological contract mediates relationship)                                      | High               | QNT39               |                                                 |   |              |
|  |                                            | Servant leadership positive related to OCB (commitment to supervisor, self-efficacy, procedural justice climate, service climate partially mediate relationship) | High               | QNT51               |                                                 |   |              |
|  | Helping Behaviour                          | Servant leadership enhances helping behaviour (mediated by promotion focus)                                                                                      | High               | QNT36               | QNT36                                           | 1 | Insufficient |
|  | Creativity and Innovative                  | Servant leadership positive related to serving culture. Serving culture enhances creativity                                                                      | High               | QNT30               | QNT30, QNT36, QNT39                             | 3 | Strong       |
|  |                                            | Servant leadership enhances creative behaviour (mediated by promotion focus)                                                                                     | High               | QNT36               |                                                 |   |              |
|  |                                            | Servant leadership enhances innovative behaviour (psychological contract mediates relationship)                                                                  | High               | QNT39               |                                                 |   |              |
|  | Organisational Commitment                  | Servant leadership positive related to organisational commitment                                                                                                 | High, Medium, High | QNT05, QNT09, QNT26 | QNT05, QNT09, QNT26, QNT34, QNT56               | 5 | Strong       |
|  |                                            | Servant leadership positive related to affective and normative commitment (not continuance commitment)                                                           | High               | QNT34               |                                                 |   |              |
|  |                                            | Servant leadership positive related to affective commitment (organisational support mediates relationship)                                                       | High               | QNT56               |                                                 |   |              |
|  |                                            | Affective trust mediates servant leadership and affective and normative commitment                                                                               | High               | QNT34               |                                                 |   |              |
|  | Supervisor Commitment                      | Servant leadership positive related to supervisor commitment                                                                                                     | High               | QNT51               | QNT52                                           | 1 | Insufficient |

|                                              |                                                                                                       |                  |                     |                                   |   |              |
|----------------------------------------------|-------------------------------------------------------------------------------------------------------|------------------|---------------------|-----------------------------------|---|--------------|
| Trust                                        | Significant relationship between servant leadership and interpersonal trust                           | High             | QNT06               | QNT06, QNT09, QNT34, QAL02        | 4 | Strong       |
|                                              | Servant leadership positive related to employee trust                                                 | Medium           | QNT09               |                                   |   |              |
|                                              | Servant leadership positive related to affective trust                                                | High             | QNT34               |                                   |   |              |
|                                              | Servant leadership enhances trust and organisational trust                                            | High             | QAL02               |                                   |   |              |
| Eudaemonic Wellbeing                         | Servant leadership positive related to eudaemic wellbeing                                             | High             | QNT07               | QNT07                             | 1 | Insufficient |
|                                              | Autonomy of motivation mediate servant leadership and eudaemic wellbeing                              | High             | QNT07               |                                   |   |              |
| Self-efficacy                                | Servant leadership positive related to self-efficacy                                                  | High, High       | QNT08, QNT50        | QNT08, QNT50                      | 2 | Strong       |
| Job Satisfaction                             | Servant leadership positive related to job satisfaction                                               | High, High, Low  | QNT32, QNT38, QAL05 | QNT11, QNT32, QNT38, QAL02, QAL05 | 5 | Strong       |
|                                              | Servant leadership positively related to job satisfaction (partially mediated by procedural justice)  | High             | QNT11               |                                   |   |              |
|                                              | Servant leadership positively related to job satisfaction (mediated by psychological climate)         | High             | QNT38               |                                   |   |              |
|                                              | Servant leadership increase employee satisfaction                                                     | High             | QAL02               |                                   |   |              |
| Person-job Fit and Person-organisational Fit | Servant leadership enhances person-job fit                                                            | High             | QNT01               | QNT01, QNT26                      | 2 | Strong       |
|                                              | Servant leadership enhances person-organisational fit                                                 | High             | QNT26               |                                   |   |              |
| Organisational Support                       | Servant leadership positive related to organisational support                                         | High             | QNT56               | QNT56                             | 1 | Insufficient |
| Employee performance                         | Servant leadership positive related to serving culture. Serving culture enhances employee performance | High             | QNT30               | QNT30                             | 1 | Insufficient |
| Public service Motivation                    | Servant leadership positive related to public service motivation                                      | High             | QNT31               | QNT32                             | 1 | Insufficient |
| Psychological Empowerment                    | Servant leadership positive related to psychological empowerment                                      | High             | QNT37               | QNT37                             | 1 | Insufficient |
| Psychological Climate                        | Servant leadership positive related to psychological climate                                          | High             | QNT38               | QNT38                             | 1 | Insufficient |
| Psychological Contract                       | Servant leadership positive related to psychological contract                                         | High             | QNT39               | QNT39                             | 1 | Insufficient |
| Leader-Member Exchange (LMX)                 | Servant leadership positive related to LMX                                                            | High, High, High | QNT19, QNT37, QNT54 | QNT19, QNT37, QNT54               | 3 | Strong       |
| Personal Learning                            | Servant leadership positive related to personal learning                                              | High, Low        | QNT49, QAL05        | QNT49, QAL05                      | 2 | Insufficient |
| Work-life Balance                            | Servant leadership positive related to work family positive spill-over                                | High             | QNT49               | QNT49, QNT55                      | 2 | Strong       |

|                |                                            |                                                                                                                                                                                                                                |            |              |                                                 |   |              |
|----------------|--------------------------------------------|--------------------------------------------------------------------------------------------------------------------------------------------------------------------------------------------------------------------------------|------------|--------------|-------------------------------------------------|---|--------------|
|                |                                            | Servant leadership negative related to work-family conflict                                                                                                                                                                    | High       | QNT49        |                                                 |   |              |
|                |                                            | Servant leadership positive related to work-to-family enrichment (mediated by organisational identification)                                                                                                                   | High       | QNT55        |                                                 |   |              |
| Team / Group   | Organizational Citizenship Behaviour (OCB) | Dyadic communication style agreement mediates servant leadership and group OCB                                                                                                                                                 | High       | QNT02        | QNT02, QNT21                                    | 2 | Strong       |
|                |                                            | Servant leadership enhances team potency. Team potency enhances team OCB                                                                                                                                                       | High       | QNT21        |                                                 |   |              |
|                | Group Identification                       | Servant leadership positive related to group identification                                                                                                                                                                    | High       | QNT08        | QNT08, QNT30, QNT55                             | 3 | Strong       |
|                |                                            | Servant leadership enhances employee identification with store (mediated by serving culture)                                                                                                                                   | High       | QNT30        |                                                 |   |              |
|                |                                            | Servant leadership positive related to organisational identification                                                                                                                                                           | High       | QNT55        |                                                 |   |              |
|                | Collaboration                              | Servant leadership positive related to collaboration                                                                                                                                                                           | High, Low  | QNT17, QAL05 | QNT17, QAL05                                    | 2 | Insufficient |
|                | Team Performance                           | Servant leadership enhances team potency. Team potency enhances team performance                                                                                                                                               | High       | QNT21        | QNT21                                           | 1 | Insufficient |
|                | Workplace Spirituality                     | Servant leadership positive related to workplace spirituality                                                                                                                                                                  | Medium     | QNT28        | QNT28                                           | 1 | Insufficient |
|                |                                            | Organisational culture moderates servant leadership and workplace spirituality                                                                                                                                                 | Medium     | QNT28        |                                                 |   |              |
|                | Service Culture and Climate                | Servant leadership positive related to serving culture                                                                                                                                                                         | High       | QNT30        | QNT30, QNT51                                    | 2 | Strong       |
|                |                                            | Servant leadership positive related to service climate                                                                                                                                                                         | High       | QNT51        |                                                 |   |              |
|                | Procedural Justice Climate                 | Servant leadership positive related to procedural justice                                                                                                                                                                      | High, High | QNT11, QNT51 | QNT11, QNT51                                    | 1 | Insufficient |
| Organisational | Customer Service                           | Servant leadership positive related to customer service performance                                                                                                                                                            | High       | QNT08        | QNT08, QNT20, QNT23, QNT25, QNT30, QNT45, QAL02 | 7 | Strong       |
|                |                                            | Social identity mediated servant leadership and customer service performance                                                                                                                                                   | High       | QNT08        |                                                 |   |              |
|                |                                            | Servant leadership positive related to service-orientated OCB (positive psychological capital mediates relationship). Psychological capital enhances customer value co-creation (service-orientated OCB mediates relationship) | High       | QNT20        |                                                 |   |              |
|                |                                            | Servant leadership positive related to customer's trust in the firm (employee trust moderates relationship)                                                                                                                    | High       | QNT23        |                                                 |   |              |
|                |                                            | Servant leadership positive related to customer satisfaction (employee trust moderates relationship)                                                                                                                           | High       | QNT23        |                                                 |   |              |
|                |                                            | Servant leadership positive related to customer orientation                                                                                                                                                                    | High       | QNT25        |                                                 |   |              |
|                |                                            |                                                                                                                                                                                                                                |            |              |                                                 |   |              |

|  |                            |                                                                                                                              |        |       |                                   |   |              |
|--|----------------------------|------------------------------------------------------------------------------------------------------------------------------|--------|-------|-----------------------------------|---|--------------|
|  |                            | Servant leadership enhances serving culture. Serving culture enhances customer serving behaviours                            | High   | QNT30 |                                   |   |              |
|  |                            | Servant leadership enhances value enhancing behaviour performance (moderated by caring ethical climate)                      | High   | QNT45 |                                   |   |              |
|  |                            | Servant leadership increase profits via reduced customer turnover                                                            | High   | QAL02 |                                   |   |              |
|  | Organisational Learning    | Servant leadership positively related to organisational learning. Organisational learning enhance organisational performance | Medium | QNT10 | QNT10                             | 1 | Insufficient |
|  | Organisational Performance | No direct relationship between servant leadership and organisational performance                                             | High   | QNT16 | QNT16, QNT41                      | 2 | Insufficient |
|  |                            | CEO servant leadership predicted subsequent firm performance (measured as return on assets)                                  | High   | QNT41 |                                   |   |              |
|  | Sales Performance          | Servant leadership enhances sales performance (mediated by ethical climate)                                                  | High   | QNT24 | QNT24, QNT25, QNT30, QNT41, QNT45 | 5 | Strong       |
|  |                            | Servant leadership enhances customer orientation. Customer orientation enhances outcome performance                          | High   | QNT25 |                                   |   |              |
|  |                            | Servant leadership enhances outcome sales performance                                                                        | High   | QNT45 |                                   |   |              |
|  |                            | Servant leadership positive related to serving culture. Serving culture enhances organisational performance                  | High   | QNT30 |                                   |   |              |
|  | Employer Brand Perception  | Servant leadership positive related to employer brand perception                                                             | High   | QNT27 | QNT27                             | 1 | Insufficient |
